# Supplementary material for: Estrogen and high-fat diet induced alterations in C57BL/6 mice endometrial transcriptome profile
Source: PubMed Central journal article supplement — Endocr Connect. 2017 Nov 13;7(1):36–46. doi: 10.1530/EC-17-0315 (PMC5744625; doi:10.1530/ec-17-0315), 2017-11-13
Supplement: ec-7-36-t002.pdf [file ec-7-36-t002.pdf]

## Supplementary Table 2.

### HFD enhances E2 activity

| Accession Number | Gene Symbol | E2-Fold Change | E2+HFD-Fold Change | Database Source |
|------------------|-------------|----------------|--------------------|-----------------|
| NM_007769        | Dmbt1       | 1.619962032    | 8.196089092        | RefSeq          |
| NM_028216        | Psca        | 10.3942007     | 40.81881324        | RefSeq          |
| NM_023785        | Ppbbp       | 12.83995434    | 48.4483625         | RefSeq          |
| NM_029796        | Lrg1        | 1.943687115    | 7.303133822        | RefSeq          |
| NM_177024        | Tmprss11bnl | 5.133462513    | 18.78632108        | RefSeq          |
| NM_001083884     | Lypd8       | 2.271071825    | 7.200559442        | RefSeq          |
| NM_007482        | Arg1        | 6.189493406    | 18.96308348        | RefSeq          |
| NM_001164787     | Sprr2a2     | 1.944216886    | 5.879014488        | RefSeq          |
| NM_007976        | F5          | 2.461197616    | 7.321400605        | RefSeq          |
| NM_010739        | Muc13       | 9.126427074    | 26.76602507        | RefSeq          |
| NM_007398        | Ada         | 1.655709229    | 4.75739451         | RefSeq          |
| NM_029638        | Abp1        | 3.236262016    | 8.522468331        | RefSeq          |
| NM_001004174     | AA467197    | 4.805652511    | 12.58110441        | RefSeq          |
| NM_001082960     | Itgam       | 2.504269509    | 6.516622091        | RefSeq          |
| NM_013515        | Stom        | 2.95122398     | 7.42659549         | RefSeq          |
| NM_011469        | Sprr2b      | 4.323737437    | 10.10583763        | RefSeq          |
| NM_001013753     | Pcdh17      | 1.948449221    | 4.520685853        | RefSeq          |
| NM_021443        | Ccl8        | 1.658130244    | 3.703316021        | RefSeq          |
| NM_009694        | Apobec2     | 3.239162846    | 7.158538131        | RefSeq          |
| NM_181596        | Retnlg      | 3.869195609    | 8.50615415         | RefSeq          |
| NM_020049        | Slc6a14     | 4.38166519     | 9.476274567        | RefSeq          |
| NM_145561        | Tmprss11d   | 2.547942552    | 5.509515033        | RefSeq          |
| NM_172880        | Tmprss11e   | 1.741700023    | 3.754916085        | RefSeq          |
| NM_145423        | Slc5a8      | 6.051437958    | 13.02825237        | RefSeq          |
| NM_001024945     | Qsox1       | 1.886240215    | 4.029743467        | RefSeq          |
| NM_007807        | Cybb        | 4.141844814    | 8.711545374        | RefSeq          |
| NM_027997        | Serpina9    | 1.715464772    | 3.607190628        | RefSeq          |
| NM_011470        | Sprr2d      | 6.592268482    | 13.76169879        | RefSeq          |
| NM_009995        | Cyp21a1     | 1.510508271    | 3.133176407        | RefSeq          |
| NM_001164612     | Atp13a4     | 1.671385664    | 3.452725561        | RefSeq          |
| NM_001128132     | Cd200r3     | 1.836582983    | 3.72647436         | RefSeq          |
| NM_010266        | Gda         | 2.179895535    | 4.353568229        | RefSeq          |
| NM_028882        | Sema3d      | 1.889244819    | 3.766661358        | RefSeq          |
| NM_181579        | Pof1b       | 1.522822808    | 3.006852989        | RefSeq          |
| NM_009474        | Uox         | 3.945886385    | 7.726874683        | RefSeq          |

|              |               |             |             |        |
|--------------|---------------|-------------|-------------|--------|
| NM_133776    | Gpr110        | 2.119058256 | 4.121799514 | RefSeq |
| NM_029008    | 4833403I15Rik | 2.280956605 | 4.393062425 | RefSeq |
| NM_011581    | Thbs2         | 1.708516878 | 3.241163203 | RefSeq |
| NM_001287172 | Alpl          | 1.929091735 | 3.580365818 | RefSeq |
| NM_013650    | S100a8        | 19.85538825 | 35.4485571  | RefSeq |
| NM_197986    | Tmem140       | 1.68814452  | 2.970779099 | RefSeq |
| NM_139148    | Clca4         | 16.62021243 | 27.97109834 | RefSeq |
| NM_001035122 | Golm1         | 1.640040945 | 2.758113194 | RefSeq |
| NM_010751    | Mxd1          | 2.698531603 | 4.494047376 | RefSeq |
| NM_027921    | Slc16a14      | 2.324736444 | 3.752571776 | RefSeq |
| NM_009114    | S100a9        | 14.32322954 | 23.07779797 | RefSeq |
| NM_028133    | Egln3         | 3.024553821 | 4.83050381  | RefSeq |
| NM_008396    | Itga2         | 2.502635906 | 3.910337144 | RefSeq |
| NM_133977    | Trf           | 2.249969846 | 3.504163279 | RefSeq |
| NM_008597    | Mgp           | 2.074649205 | 3.224953443 | RefSeq |
| NM_173007    | Tspan12       | 1.909244675 | 2.962518165 | RefSeq |
| NM_001033367 | Nlrc4         | 1.724193271 | 2.63263832  | RefSeq |
| NM_011082    | Pigr          | 2.022295751 | 3.083629995 | RefSeq |
| NM_019514    | Astn2         | 0.473953606 | 0.312879925 | RefSeq |
| NM_001081354 | Maml1d1       | 0.372820303 | 0.238252402 | RefSeq |
| NM_001005854 | Gm609         | 0.495672257 | 0.150884446 | RefSeq |
| NM_008630    | Mt2           | 0.665630486 | 0.378636133 | RefSeq |

### HFD represses E2 activity

| Accession Number | Gene Symbol | E2-Fold Change | E2+HFD-Fold Change | Database Source |
|------------------|-------------|----------------|--------------------|-----------------|
| NM_001145799     | Ctla2a      | 6.926934746    | 3.802698786        | RefSeq          |
| NM_009475        | Prap1       | 4.64400921     | 2.539873539        | RefSeq          |
| NM_001204203     | Spp1        | 8.280947887    | 3.386378733        | RefSeq          |
| BC120655         | Mmp7        | 7.288786623    | 2.923168515        | GenBank         |
| NM_011198        | Ptgs2       | 9.343293902    | 3.622842281        | RefSeq          |
| NM_027890        | Susd2       | 0.361822304    | 0.573922033        | RefSeq          |

## E2 enhances HFD activity

| Accession Number | Gene Symbol | HFD-Fold Change | E2+HFD-Fold Change | Database Source |
|------------------|-------------|-----------------|--------------------|-----------------|
| NM_028216        | Psca        | 1.724691907     | 40.81881324        | RefSeq          |
| NM_023785        | Ppbp        | 2.102511464     | 48.4483625         | RefSeq          |
| NM_013650        | S100a8      | 1.897880295     | 35.4485571         | RefSeq          |
| NM_009114        | S100a9      | 1.677371211     | 23.07779797        | RefSeq          |
| NM_139148        | Clca4       | 3.099937224     | 27.97109834        | RefSeq          |
| NM_008392        | Irg1        | 1.560638432     | 13.15334655        | RefSeq          |
| NM_153511        | Il1f9       | 2.560953398     | 19.21836013        | RefSeq          |
| NM_010739        | Muc13       | 3.91369049      | 26.76602507        | RefSeq          |
| NM_001004174     | AA467197    | 2.028695025     | 12.58110441        | RefSeq          |
| NM_011470        | Sprr2d      | 2.250105532     | 13.76169879        | RefSeq          |
| NM_011410        | Slnf4       | 1.546061098     | 8.841574665        | RefSeq          |
| NM_145423        | Slc5a8      | 2.30875593      | 13.02825237        | RefSeq          |
| NM_029796        | Lrg1        | 1.515435728     | 7.303133822        | RefSeq          |
| NM_007976        | F5          | 1.534460668     | 7.321400605        | RefSeq          |
| NM_030601        | Clca2       | 1.579621964     | 7.421506135        | RefSeq          |
| NM_008147        | Gp49a       | 2.091207664     | 9.197352705        | RefSeq          |
| NM_020049        | Slc6a14     | 2.199658661     | 9.476274567        | RefSeq          |
| NM_007807        | Cybb        | 2.024279263     | 8.711545374        | RefSeq          |
| NM_177024        | Tmprss11bnl | 4.408098108     | 18.78632108        | RefSeq          |
| NM_013532        | Lilrb4      | 2.16048418      | 8.884672925        | RefSeq          |
| NM_013515        | Stom        | 1.828386831     | 7.42659549         | RefSeq          |
| NM_020008        | Clec7a      | 1.5749416       | 5.931998913        | RefSeq          |
| NM_001110517     | Gm14446     | 2.202071022     | 7.992729881        | RefSeq          |
| NM_011337        | Ccl3        | 1.539572706     | 5.383407618        | RefSeq          |
| NM_009474        | Uox         | 2.219133817     | 7.726874683        | RefSeq          |
| NM_001164787     | Sprr2a2     | 1.819717712     | 5.879014488        | RefSeq          |
| NM_011469        | Sprr2b      | 3.181664395     | 10.10583763        | RefSeq          |
| NM_007651        | Cd53        | 1.848735288     | 5.745873907        | RefSeq          |
| NM_007482        | Arg1        | 6.314017824     | 18.96308348        | RefSeq          |
| NM_029638        | Abp1        | 2.871451113     | 8.522468331        | RefSeq          |
| NM_010751        | Mxd1        | 1.539634246     | 4.494047376        | RefSeq          |
| NM_001013753     | Pcdh17      | 1.623699512     | 4.520685853        | RefSeq          |
| NM_010554        | Il1a        | 5.26881552      | 13.90132345        | RefSeq          |
| NM_181596        | Retnlg      | 3.365099119     | 8.50615415         | RefSeq          |
| NM_008396        | Itga2       | 1.603843456     | 3.910337144        | RefSeq          |
| NM_030691        | Igsf6       | 1.669640306     | 4.046627354        | RefSeq          |
| NM_001128132     | Cd200r3     | 1.538395023     | 3.72647436         | RefSeq          |

|              |           |             |             |        |
|--------------|-----------|-------------|-------------|--------|
| NM_028882    | Sema3d    | 1.56265215  | 3.766661358 | RefSeq |
| NM_021443    | Ccl8      | 1.607563805 | 3.703316021 | RefSeq |
| NM_001024945 | Qsox1     | 1.760208912 | 4.029743467 | RefSeq |
| NM_010266    | Gda       | 1.955599127 | 4.353568229 | RefSeq |
| NM_001145799 | Ctla2a    | 1.728763279 | 3.802698786 | RefSeq |
| NM_133977    | Trf       | 1.642318188 | 3.504163279 | RefSeq |
| NM_007769    | Dmbt1     | 3.848675404 | 8.196089092 | RefSeq |
| NM_008409    | Itn2a     | 1.594613366 | 3.327723734 | RefSeq |
| NM_134066    | Akr1c18   | 2.231077559 | 4.654686489 | RefSeq |
| NM_029499    | Ms4a4c    | 1.545611785 | 3.223415877 | RefSeq |
| NM_011662    | Tyropb    | 1.811994195 | 3.775874986 | RefSeq |
| NM_018857    | Msln      | 1.721948506 | 3.554557567 | RefSeq |
| NM_001164612 | Atp13a4   | 1.67432199  | 3.452725561 | RefSeq |
| NM_027997    | Serpina9  | 1.755038485 | 3.607190628 | RefSeq |
| NM_008597    | Mgp       | 1.586801134 | 3.224953443 | RefSeq |
| NM_001204203 | Spp1      | 1.67787472  | 3.386378733 | RefSeq |
| NM_009777    | C1qb      | 1.728533623 | 3.481375264 | RefSeq |
| NM_008620    | Gbp4      | 1.569061246 | 3.155784447 | RefSeq |
| NM_010185    | Fcer1g    | 1.710331526 | 3.435435508 | RefSeq |
| NM_205820    | Tlr13     | 1.60238705  | 3.193197972 | RefSeq |
| NM_197986    | Tmem140   | 1.505437346 | 2.970779099 | RefSeq |
| NM_019450    | Il1f6     | 2.199678483 | 4.229327655 | RefSeq |
| NM_011198    | Ptgs2     | 1.887157718 | 3.622842281 | RefSeq |
| NM_011581    | Thbs2     | 1.71127229  | 3.241163203 | RefSeq |
| NM_001252472 | Cd84      | 1.6998699   | 3.105246938 | RefSeq |
| NM_018881    | Fmo2      | 1.507698894 | 2.704345853 | RefSeq |
| NM_153505    | Nckap1l   | 1.631300239 | 2.876035865 | RefSeq |
| NM_013484    | C2        | 1.585405258 | 2.779743953 | RefSeq |
| NM_139198    | Plac8     | 2.279143348 | 3.967664394 | RefSeq |
| NM_145561    | Tmprss11d | 3.224534712 | 5.509515033 | RefSeq |
| NM_181579    | Pof1b     | 1.765517352 | 3.006852989 | RefSeq |
| NM_010821    | Mpeg1     | 2.702794829 | 4.562477149 | RefSeq |
| NM_010745    | Ly86      | 1.741541276 | 2.929385376 | RefSeq |
| NM_133776    | Gpr110    | 2.458363638 | 4.121799514 | RefSeq |
| NM_007398    | Ada       | 2.873691781 | 4.75739451  | RefSeq |
| NM_028696    | Nabp1     | 1.527199639 | 2.526034483 | RefSeq |
| NM_008760    | Ogn       | 1.678984215 | 2.74374613  | RefSeq |
| NM_029419    | Apol7a    | 1.61425631  | 2.629218424 | RefSeq |
| NM_011082    | Pigr      | 1.910508046 | 3.083629995 | RefSeq |
| NM_001037859 | Csf1r     | 1.585668288 | 2.471672049 | RefSeq |

|              |          |             |             |        |
|--------------|----------|-------------|-------------|--------|
| NM_008013    | Fgl2     | 1.541599134 | 2.379100692 | RefSeq |
| NM_001082960 | Itgam    | 4.235469792 | 6.516622091 | RefSeq |
| NM_026588    | Stx19    | 1.506873177 | 2.312910328 | RefSeq |
| NM_009402    | Pglyrp1  | 2.038635712 | 3.1251866   | RefSeq |
| NM_001287172 | Alpl     | 2.341205111 | 3.580365818 | RefSeq |
| NM_001033367 | Nlrc4    | 1.724431315 | 2.63263832  | RefSeq |
| NM_008102    | Gch1     | 1.855595604 | 2.828178804 | RefSeq |
| NM_027921    | Slc16a14 | 2.462731478 | 3.752571776 | RefSeq |
| NM_010130    | Emr1     | 2.056047127 | 3.111486529 | RefSeq |
| NM_009995    | Cyp21a1  | 2.074789058 | 3.133176407 | RefSeq |
| NM_001005854 | Gm609    | 0.589624346 | 0.150884446 | RefSeq |
| NM_010570    | Irs1     | 0.661794864 | 0.281664373 | RefSeq |
| NM_001081354 | Maml1    | 0.510919062 | 0.238252402 | RefSeq |
| NM_029620    | Pcolce2  | 0.64580835  | 0.315810345 | RefSeq |
| NM_019514    | Astn2    | 0.554440801 | 0.312879925 | RefSeq |
| NM_172925    | Klhl31   | 0.514292018 | 0.334257924 | RefSeq |

## E2 represses HFD activity

| Accession Number | Gene Symbol | HFD-Fold Change | E2+HFD-Fold Change | Database Source |
|------------------|-------------|-----------------|--------------------|-----------------|
| NM_011978        | Slc27a2     | 2.483391414     | 1.55583313         | RefSeq          |
| NM_009475        | Prap1       | 5.110697968     | 2.539873539        | RefSeq          |
| NM_013737        | Pla2g7      | 0.369271544     | 0.637961234        | RefSeq          |
