# Supplementary material for: Estrogen and high-fat diet induced alterations in C57BL/6 mice endometrial transcriptome profile
Source: PubMed Central journal article supplement — Endocr Connect. 2017 Nov 13;7(1):36–46. doi: 10.1530/EC-17-0315 (PMC5744625; doi:10.1530/ec-17-0315), 2017-11-13
Supplement: ec-7-36-t003.pdf [file ec-7-36-t003.pdf]

**Supplementary Table 3. Genes accompanied by insulin resistance and inhibited insulin response Signaling pathway in HFD group.**

| <b>Accession Number</b> | <b>Gene Symbol</b> | <b>Fold Change</b> | <b>Gene Feature</b> |
|-------------------------|--------------------|--------------------|---------------------|
| NM_010570               | <i>Irs1</i>        | -1.511042          | Down                |
| NM_010513               | <i>Igf1r</i>       | -1.148039          | Down                |
| NM_010512               | <i>Igf1</i>        | -1.020113          | Up                  |
| NM_011400               | <i>Slc2a1</i>      | 1.110382           | Up                  |
| NM_009204               | <i>Slc2a4</i>      | 1.157821           | Up                  |
| NM_008341               | <i>Igfbp1</i>      | 1.029971           | Up                  |
| NM_153526               | <i>Insig1</i>      | 1.276597           | Up                  |
| NM_011952               | <i>Mapk3</i>       | -1.145019          | Down                |
| NM_001286718            | <i>Tsc2</i>        | -1.183652          | Down                |
| NM_031868               | <i>Ppp1ca</i>      | -1.29388           | Down                |
| NM_001081212            | <i>Irs2</i>        | -1.167073          | Down                |
| NM_007619               | <i>Cbl</i>         | -1.206653          | Down                |
| NM_001135559            | <i>Sos2</i>        | -1.29442           | Down                |
| NM_011785               | <i>Akt3</i>        | -1.241851          | Down                |
| NM_175935               | <i>G6pc3</i>       | -1.205068          | Down                |
| NM_027416               | <i>Calml3</i>      | 1.450676           | Up                  |
| NM_021462               | <i>Mknk2</i>       | 1.206144           | Up                  |
| NM_011158               | <i>Prkar2b</i>     | 1.997688           | Up                  |
| NM_010548               | <i>Il10</i>        | 1.006829           | Up                  |
| NM_146141               | <i>Ppa2</i>        | 1.085743           | Up                  |
| NM_009399               | <i>Tnfrsf11a</i>   | 1.134187           | Up                  |
| NM_213659               | <i>Stat3</i>       | 1.009866           | Up                  |
| NM_011101               | <i>Prkca</i>       | 1.08776            | Up                  |
| NM_021297               | <i>Tlr4</i>        | 1.1847             | Up                  |
